# Supplementary material for: Cu2O hydrides promote the selective semihydrogenation of alkynes on Pd–Cu2O/TiO2 under mild conditions
Source: Royal Society of Chemistry journal article supplement (doi:10.1039/d1cy00236h), 2021-01-01
Supplement: d1cy00236h1.pdf [file d1cy00236h1.pdf]

## Electronic Supplementary Information

### **Cu<sub>2</sub>O Hydrides Promote Selective Semihydrogenation of Alkynes on Pd-Cu<sub>2</sub>O/TiO<sub>2</sub> under Mild Conditions**

Jing Zhao,<sup>a</sup> Hucheng Zhang,<sup>a, \*</sup> Fangfang Yan,<sup>a</sup> Huanli Jia,<sup>a</sup> Ze Li<sup>a</sup> and Jianji Wang<sup>a,\*</sup>

Collaborative Innovation Centre of Henan Province for Green Manufacturing of Fine Chemicals, Key Laboratory of Green Chemical Media and Reactions, Ministry of Education, School of Chemistry and Chemical Engineering, Henan Normal University, Xinxiang, Henan 453007, China. E-mail: hzhang@htu.edu.cn; jwang@htu.edu.cn.

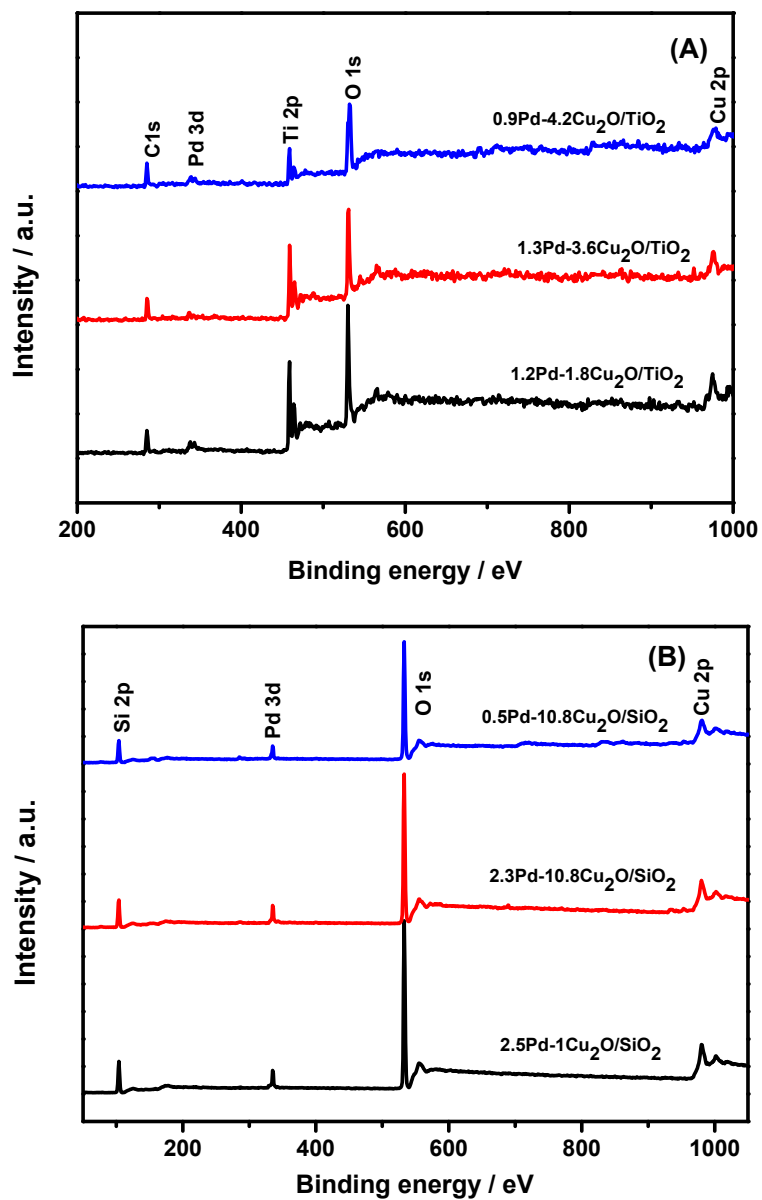

**Figure S1.** XPS survey spectra. (A) TiO<sub>2</sub> supported catalysts. (B) SiO<sub>2</sub> supported catalysts.

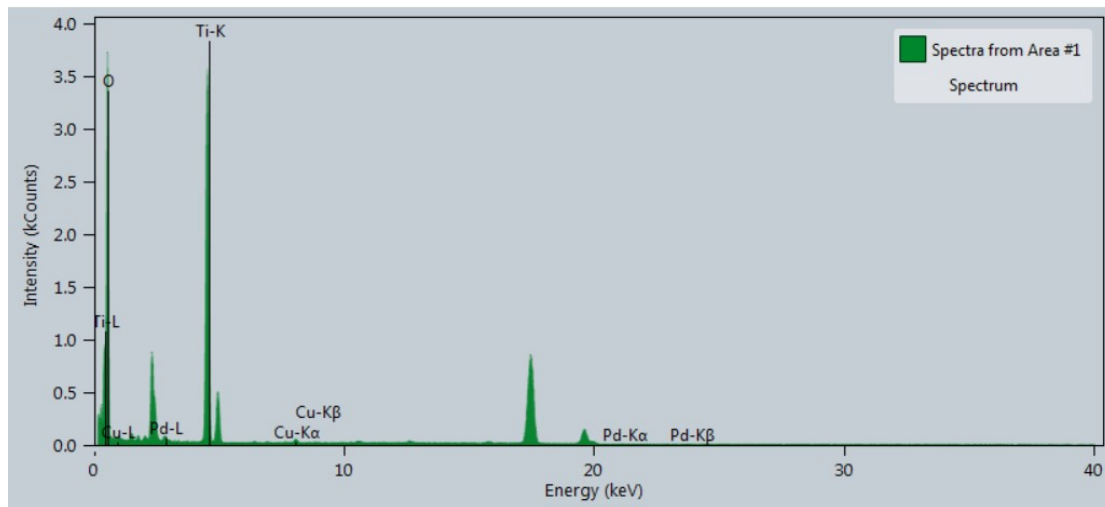

**Figure S2.** EDS spectrum extracted from the map data.

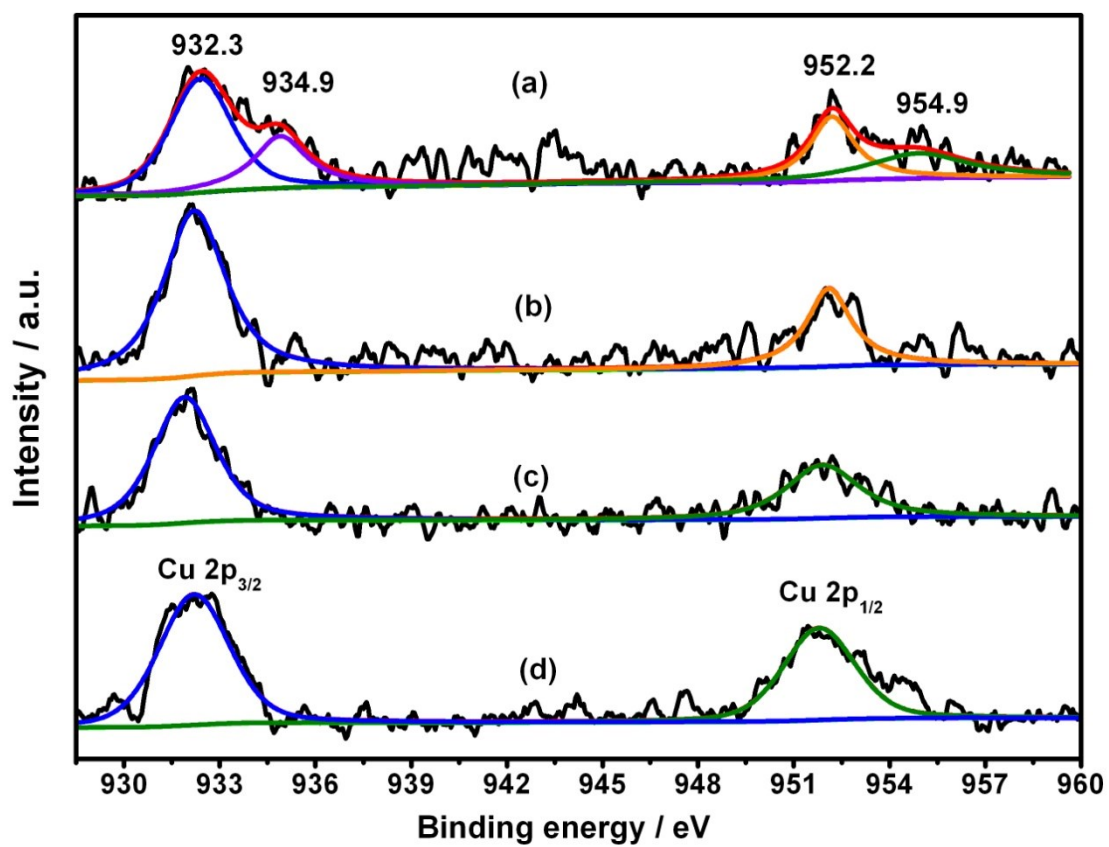

**Figure S3.** High resolution XPS spectrum of Cu 2p respectively in  $3.6\text{Cu}_2\text{O}/\text{TiO}_2$  (a),  $1.3\text{Pd}-3.6 \text{Cu}_2\text{O}/\text{TiO}_2$  (b),  $0.9\text{Pd}-4.2\text{Cu}_2\text{O}/\text{TiO}_2$  (c), and  $1.2\text{Pd}-1.8\text{Cu}_2\text{O}/\text{TiO}_2$  (d).

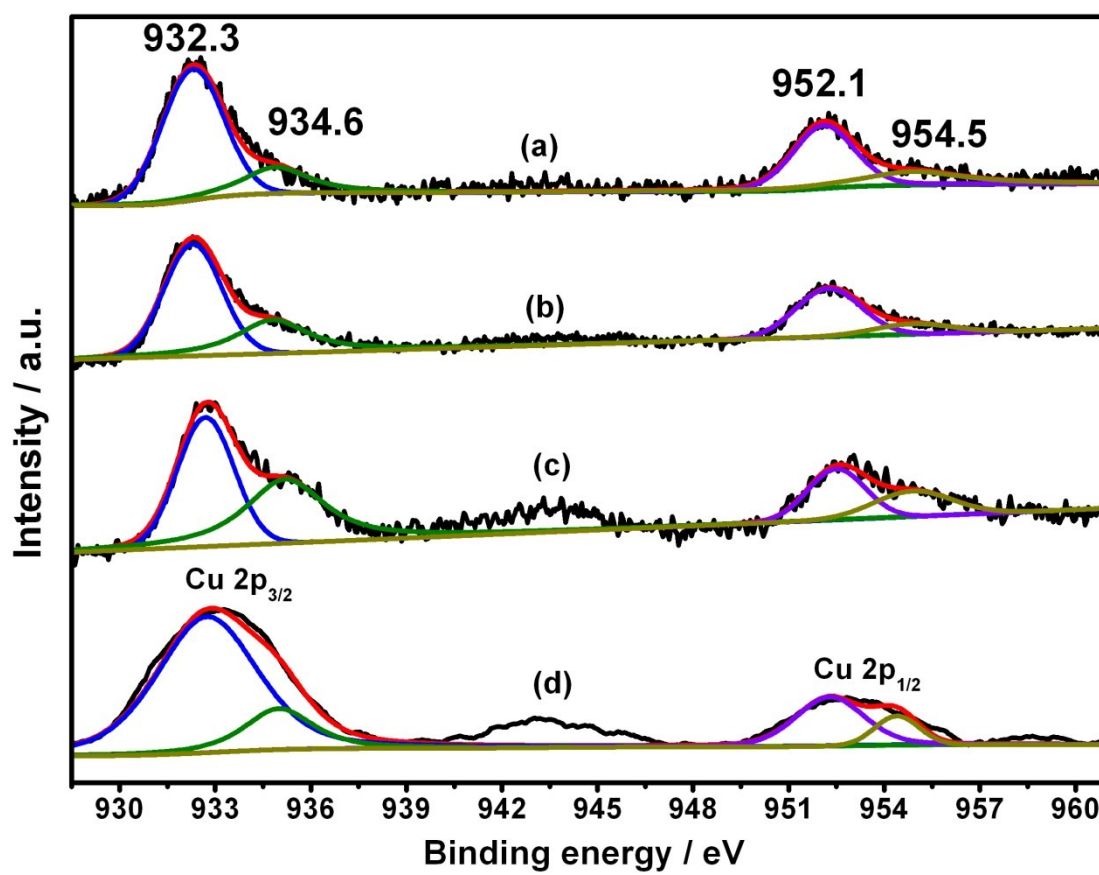

**Figure S4.** High resolution XPS spectrum of Cu 2p respectively in 10.8Cu<sub>2</sub>O/SiO<sub>2</sub> (a), 2.3Pd-10.8Cu<sub>2</sub>O/SiO<sub>2</sub> (b), 0.5Pd-10.8Cu<sub>2</sub>O/SiO<sub>2</sub> (c), and 2.2Pd-1Cu<sub>2</sub>O/SiO<sub>2</sub> (d).

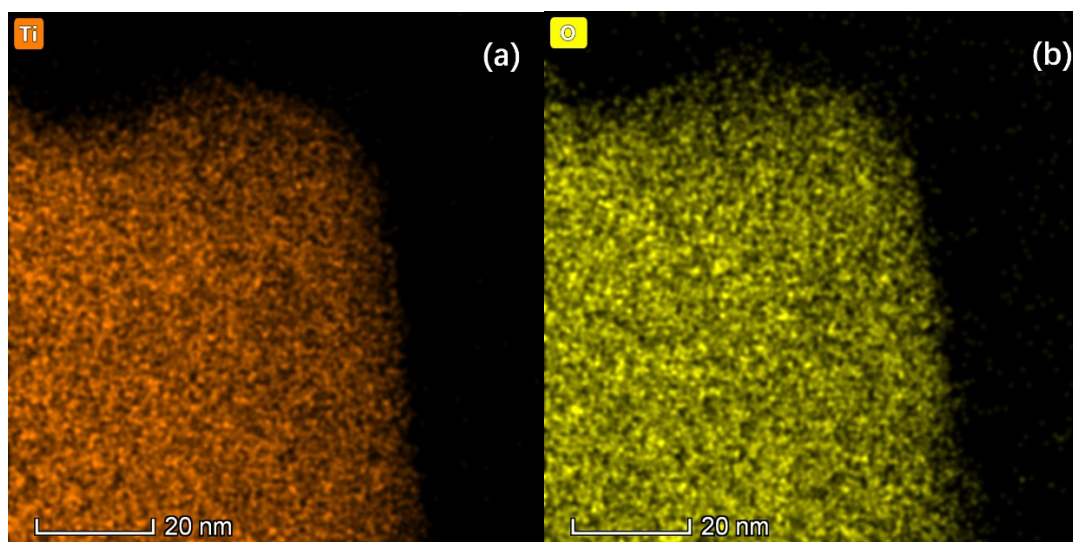

**Figure S5.** Element mapping images of Ti (a) and O (b) of 1.3Pd-3.6Cu<sub>2</sub>O/TiO<sub>2</sub>.

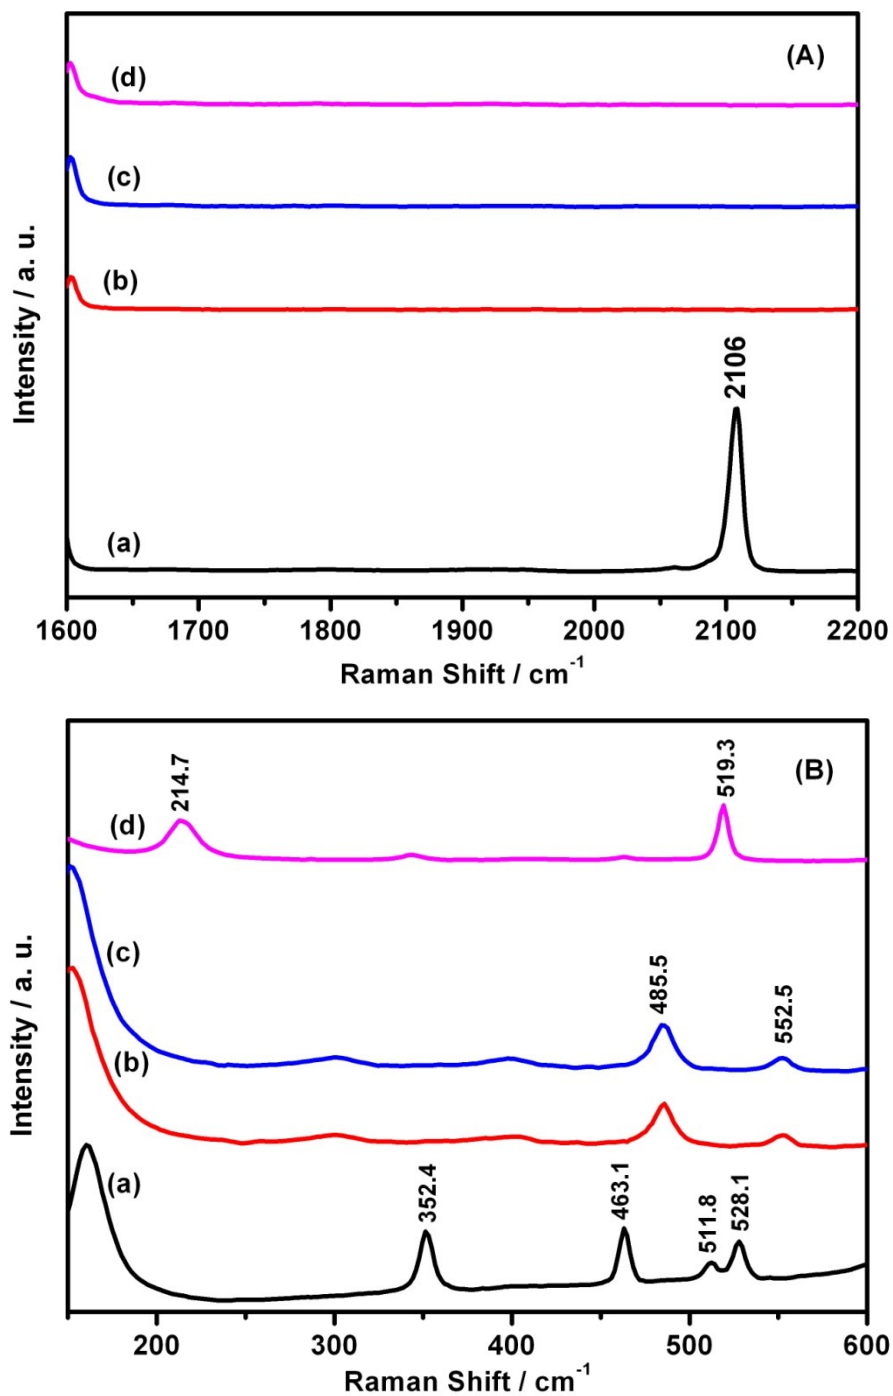

**Figure S6.** Raman spectra over the spectral range of 1600~2200  $\text{cm}^{-1}$  (A) and 150~600  $\text{cm}^{-1}$  (B) for phenylacetylene (a), styrene (b), ethylbenzene (c), and toluene (d).

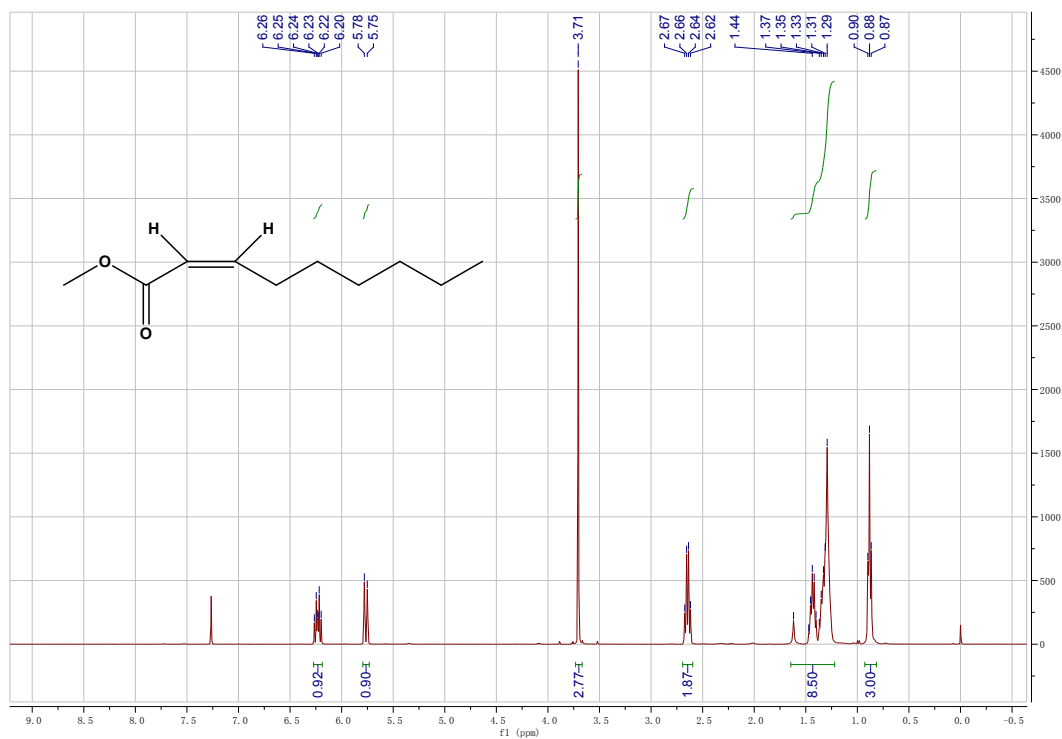

**Figure S7.** <sup>1</sup>H NMR spectra for (Z)-methyl non-2-enoate obtained from the semihydrogenation of methyl non-2-ynoate. <sup>1</sup>H NMR (400 MHz, CDCl<sub>3</sub>): 0.88 (t, 3H, J=4Hz), 1.29-1.44 (m, 8H), 2.62-2.67 (m, 2H), 3.71 (s, 3H), 5.76 (d, 1H, J= 12 Hz), 6.20-6.26 (dt, 1H, J=12, 4 Hz) ppm.



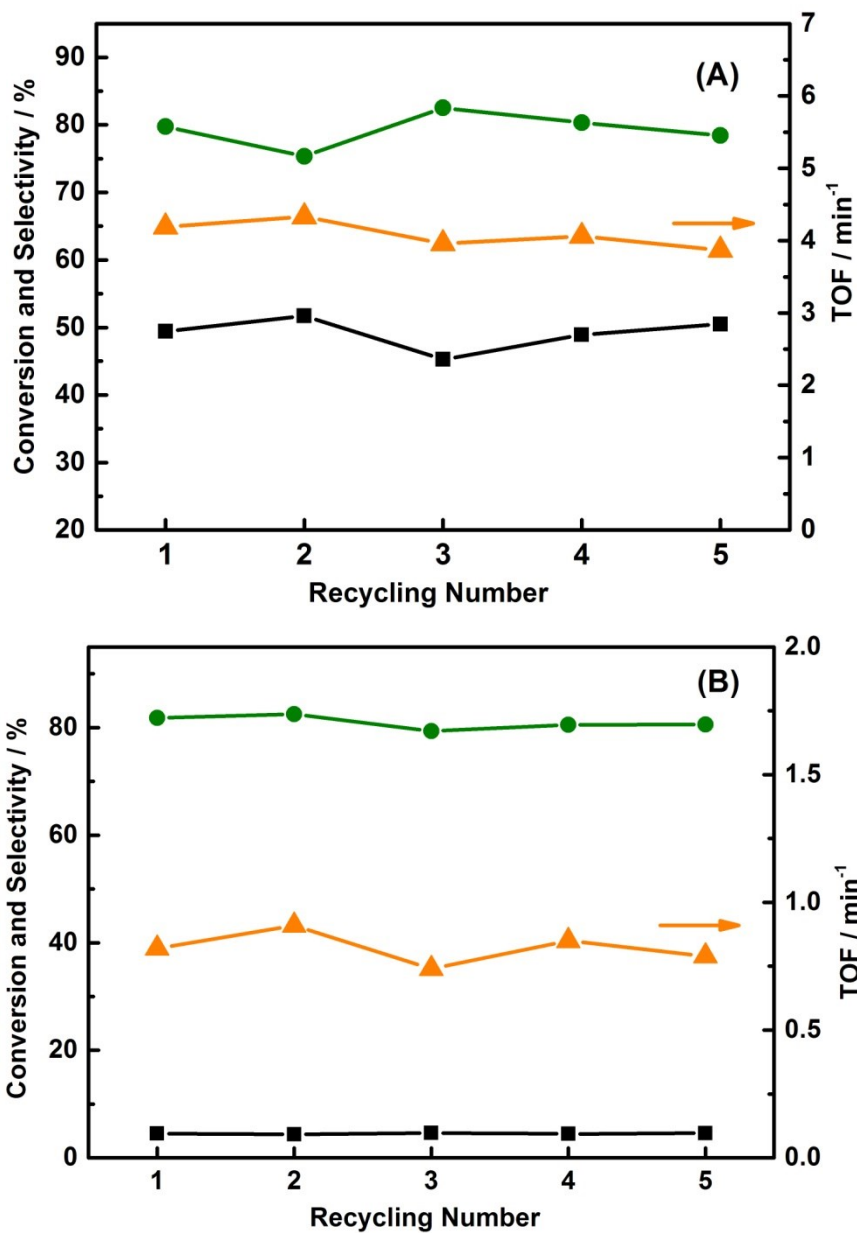

**Figure S8.** Recyclability of 1.3Pd-3.6Cu<sub>2</sub>O/TiO<sub>2</sub> (A) and 2.3Pd-10.8Cu<sub>2</sub>O/SiO<sub>2</sub> (B) in the semihydrogenation measured from phenylacetylene conversion (■), styrene selectivity (●), and TOF (▲). Reaction conditions: 9.1×10<sup>-4</sup> mol phenylacetylene, 20.1 mg catalyst, 3 mL toluene, 1 atm H<sub>2</sub>, 30°C and 45 min.

**Table S1.** Metal content and molar ratio of Pd to Cu atoms in Pd-Cu<sub>2</sub>O/TiO<sub>2</sub> catalysts detected by ICP-MAS.

| catalyst <sup>a</sup>                        | Pd<br>(wt%) | Cu<br>(wt%) | n <sub>Pd</sub> /n <sub>Cu</sub> |
|----------------------------------------------|-------------|-------------|----------------------------------|
| 0.9Pd-4.2 Cu <sub>2</sub> O/TiO <sub>2</sub> | 0.91        | 1.85        | 1.17                             |
| 0.7Pd-2.5 Cu <sub>2</sub> O/TiO <sub>2</sub> | 0.73        | 1.11        | 1.56                             |
| 1.2Pd-3.6 Cu <sub>2</sub> O/TiO <sub>2</sub> | 1.18        | 1.61        | 1.74                             |
| 0.7Pd-2 Cu <sub>2</sub> O/TiO <sub>2</sub>   | 0.68        | 0.90        | 1.79                             |
| 1.3Pd-3.6 Cu <sub>2</sub> O/TiO <sub>2</sub> | 1.27        | 1.59        | 1.90                             |
| 1.2Pd-2.5 Cu <sub>2</sub> O/TiO <sub>2</sub> | 1.19        | 1.10        | 2.59                             |
| 1Pd-2 Cu <sub>2</sub> O/TiO <sub>2</sub>     | 1.03        | 0.90        | 2.74                             |
| 1.1Pd-2.5 Cu <sub>2</sub> O/TiO <sub>2</sub> | 1.05        | 1.10        | 3.12                             |
| 1.2Pd-1.8 Cu <sub>2</sub> O/TiO <sub>2</sub> | 1.19        | 0.81        | 4.38                             |

a. 0.005g catalysts each used for ICP-MASS.

**Table S2.** Metal content and molar ratio of Pd to Cu atoms in Pd-Cu<sub>2</sub>O/SiO<sub>2</sub> catalysts detected by ICP-MAS.

| Catalyst <sup>b</sup>                        | Pd<br>(wt%) | Cu<br>(wt%) | n <sub>Pd</sub> /n <sub>Cu</sub> |
|----------------------------------------------|-------------|-------------|----------------------------------|
| 0.5Pd-10.8Cu <sub>2</sub> O/SiO <sub>2</sub> | 0.51        | 4.79        | 0.06                             |
| 1.1Pd-6.3Cu <sub>2</sub> O/SiO <sub>2</sub>  | 1.11        | 2.79        | 0.23                             |
| 1.7Pd-9.7Cu <sub>2</sub> O/SiO <sub>2</sub>  | 1.70        | 4.29        | 0.23                             |
| 1.1Pd-1.4Cu <sub>2</sub> O/SiO <sub>2</sub>  | 1.08        | 0.62        | 0.27                             |
| 2.3Pd-10.8Cu <sub>2</sub> O/SiO <sub>2</sub> | 2.25        | 4.79        | 0.47                             |
| 2.9Pd-5.9Cu <sub>2</sub> O/SiO <sub>2</sub>  | 2.86        | 2.62        | 0.65                             |
| 1.9Pd-1.5Cu <sub>2</sub> O/SiO <sub>2</sub>  | 1.91        | 0.66        | 1.05                             |
| 2Pd-5.5Cu <sub>2</sub> O/SiO <sub>2</sub>    | 1.96        | 2.45        | 1.74                             |
| 2.2Pd-1Cu <sub>2</sub> O/SiO <sub>2</sub>    | 2.15        | 0.46        | 2.83                             |

b. 0.07g catalysts each used for ICP-MASS.

**Table S3.** Catalysis of 1.3Pd/TiO<sub>2</sub> and 1.3Pd/Cu<sub>2</sub>O in the semihydrogenation of phenylacetylene

| Catalyst                | Conversion <sup>a</sup><br>(%) | Selectivity <sup>b</sup><br>(%) |
|-------------------------|--------------------------------|---------------------------------|
| 1.3Pd/TiO <sub>2</sub>  | 85.4%                          | 23.6%                           |
| 1.3Pd/Cu <sub>2</sub> O | 100%                           | 55.8%                           |

Reaction conditions: catalyst (0.0201g), phenylacetylene ( $9.1 \times 10^{-4}$ mol), Toluene (3 mL), reaction temperature: 30°C. <sup>a,b</sup> Determined by GC-MS using internal standard technique. H<sub>2</sub> (1atm). Reaction time: 90min.

**Table S4.** Catalysis of Pd-Cu/TiO<sub>2</sub> Catalysts in the semihydrogenation of phenylacetylene

| Entry | catalyst                                    | n(Pd)/n(Cu) <sup>a</sup> | Conversion <sup>b</sup><br>(%) | Selectivity <sup>c</sup><br>(%) | TOF <sup>d</sup><br>(min <sup>-1</sup> ) |
|-------|---------------------------------------------|--------------------------|--------------------------------|---------------------------------|------------------------------------------|
| 1     | 3.6Cu <sub>2</sub> O/TiO <sub>2</sub>       | -                        | 0                              | 0                               | 0                                        |
| 2     | 0.9Pd-4.2Cu <sub>2</sub> O/TiO <sub>2</sub> | 1.17                     | 19.35                          | 78.46                           | 6.79                                     |
| 3     | 0.7Pd-2.5Cu <sub>2</sub> O/TiO <sub>2</sub> | 1.56                     | 20.82                          | 94.26                           | 1.78                                     |
| 4     | 1.2Pd-3.6Cu <sub>2</sub> O/TiO <sub>2</sub> | 1.74                     | 68.46                          | 89.59                           | 4.82                                     |
| 5     | 0.7Pd-2Cu <sub>2</sub> O/TiO <sub>2</sub>   | 1.79                     | 68.58                          | 94.54                           | 3.79                                     |
| 6     | 1.3Pd-3.6Cu <sub>2</sub> O/TiO <sub>2</sub> | 1.90                     | 100                            | 97.59                           | 5.89                                     |
| 7     | 1.2Pd-2.5Cu <sub>2</sub> O/TiO <sub>2</sub> | 2.59                     | 74.73                          | 94.26                           | 3.15                                     |
| 8     | 1Pd-2Cu <sub>2</sub> O/TiO <sub>2</sub>     | 2.74                     | 68.67                          | 89.82                           | 2.69                                     |
| 9     | 1.1Pd-2.5Cu <sub>2</sub> O/TiO <sub>2</sub> | 3.12                     | 67.58                          | 94.54                           | 3.47                                     |
| 10    | 1.2Pd-1.8Cu <sub>2</sub> O/TiO <sub>2</sub> | 4.38                     | 48.86                          | 82.83                           | 2.95                                     |

Reaction conditions: catalyst (0.0201g), phenylacetylene (9.1\*10<sup>-4</sup>mol), Toluene (3 mL), <sup>a</sup> Determined by ICP-MAS. <sup>b,c,d</sup> Determined by GC-MAS using internal standard technique. H<sub>2</sub> (1atm). Reaction time: 90min.

**Table S5.** Catalysis of Pd-Cu/SiO<sub>2</sub> Catalysts in the semihydrogenation of phenylacetylene.

| Entry | catalyst                                     | n(Pd)/n(Cu) <sup>a</sup> | Conversion <sup>b</sup><br>(%) | Selectivity <sup>c</sup><br>(%) | TOF <sup>d</sup><br>(min <sup>-1</sup> ) |
|-------|----------------------------------------------|--------------------------|--------------------------------|---------------------------------|------------------------------------------|
| 1     | 10.8Cu <sub>2</sub> O/SiO <sub>2</sub>       | -                        | 0                              | 0                               | 0                                        |
| 2     | 0.5Pd-10.8Cu <sub>2</sub> O/SiO <sub>2</sub> | 0.06                     | 5.34                           | 88.29                           | 1.00                                     |
| 3     | 1.7Pd-9.7Cu <sub>2</sub> O/SiO <sub>2</sub>  | 0.23                     | 7.90                           | 91.19                           | 2.02                                     |
| 4     | 1.1Pd-6.3Cu <sub>2</sub> O/SiO <sub>2</sub>  | 0.23                     | 11.99                          | 94.13                           | 4.34                                     |
| 5     | 2.3Pd-10.8Cu <sub>2</sub> O/SiO <sub>2</sub> | 0.27                     | 23.30                          | 94.51                           | 4.68                                     |
| 6     | 2Pd-5.5Cu <sub>2</sub> O/SiO <sub>2</sub>    | 0.47                     | 6.26                           | 90.21                           | 0.92                                     |
| 7     | 2.9Pd-5.9Cu <sub>2</sub> O/SiO <sub>2</sub>  | 0.65                     | 4.35                           | 90.55                           | 0.83                                     |
| 8     | 1.1Pd-1.4Cu <sub>2</sub> O/SiO <sub>2</sub>  | 1.05                     | 4.13                           | 86.37                           | 0.66                                     |
| 9     | 1.9Pd-1.5Cu <sub>2</sub> O/SiO <sub>2</sub>  | 1.74                     | 3.96                           | 85.28                           | 0.68                                     |
| 10    | 2.2Pd-1Cu <sub>2</sub> O/SiO <sub>2</sub>    | 2.83                     | 3.10                           | 84.99                           | 0.60                                     |

Reaction conditions: catalyst (0.0201g), phenylacetylene ( $9.1 \times 10^{-4}$  mol), Toluene (3 mL), <sup>a</sup> Determined by ICP-MASS. <sup>b,c,d</sup> Determined by GC-MASS using internal standard technique. H<sub>2</sub> (1atm). Reaction time: 90 min.

**Table S6.** Semihydrogenation of methyl non-2-ynoate in the presence of Pd-Cu<sub>2</sub>O/TiO<sub>2</sub> or Pd-Cu<sub>2</sub>O/SiO<sub>2</sub> Catalyst.

| Entry | catalyst                                     | n <sub>Pd</sub> /<br>n <sub>Cu</sub> <sup>a</sup> | Conversion <sup>b</sup><br>(%) | Selectivity <sup>b</sup><br>(%) | TOF <sup>b</sup><br>(min <sup>-1</sup> ) | (Z)/(E) |
|-------|----------------------------------------------|---------------------------------------------------|--------------------------------|---------------------------------|------------------------------------------|---------|
| 1     | 0.9Pd-4.2Cu <sub>2</sub> O/TiO <sub>2</sub>  | 1.16                                              | 100                            | 92.4                            | 5.98                                     | 92:8    |
| 2     | 1.3Pd-3.6Cu <sub>2</sub> O/TiO <sub>2</sub>  | 1.90                                              | 100                            | 92.4                            | 6.29                                     | 95:5    |
| 3     | 1.2Pd-1.8Cu <sub>2</sub> O/TiO <sub>2</sub>  | 4.37                                              | 100                            | 94.6                            | 5.65                                     | 91:9    |
| 4     | 0.5Pd-10.8Cu <sub>2</sub> O/SiO <sub>2</sub> | 0.06                                              | 12.3                           | 89.2                            | 2.87                                     | 90:10   |
| 5     | 2.3Pd-10.8Cu <sub>2</sub> O/SiO <sub>2</sub> | 0.23                                              | 24.6                           | 91.3                            | 3.51                                     | 94:6    |
| 6     | 2.2Pd-1Cu <sub>2</sub> O/SiO <sub>2</sub>    | 2.29                                              | 18.4                           | 90.7                            | 1.10                                     | 89:11   |

Reaction conditions: catalyst: 0.0201g; methyl non-2-ynoate:  $5.44 \times 10^{-4}$  mol, R<sub>1</sub>=C<sub>6</sub>H<sub>13</sub> and R<sub>2</sub>=CO<sub>2</sub>Me; THF: 3mL; H<sub>2</sub>: 1atm; reaction time: 45 min; reaction temperature: 30°C. <sup>a</sup> Determined by ICP-MAS. <sup>b</sup> Determined by GC using internal standard method.
